# Supplementary material for: Mass production of a 3D non-woven nanofabric with crystalline P3HT nanofibrils for organic solar cells
Source: Royal Society of Chemistry journal article supplement (doi:10.1039/c2ee23987f), 2013-01-01
Supplement: c2ee23987f.pdf [file c2ee23987f.pdf]

Supplementary Information

## Mass Production of a 3D Non-woven Nanofabric with Crystalline P3HT Nanofibrils for Organic Solar Cells

Jin Young Oh,<sup>‡</sup> Tae Il Lee,<sup>‡</sup> Woo Soon Jang, Soo Sang Chae, Jee Ho Park, Hyun Woo Lee, Jae-Min Myoung,<sup>\*</sup> Hong Koo Baik<sup>\*</sup>

### Supporting information 1: Figure

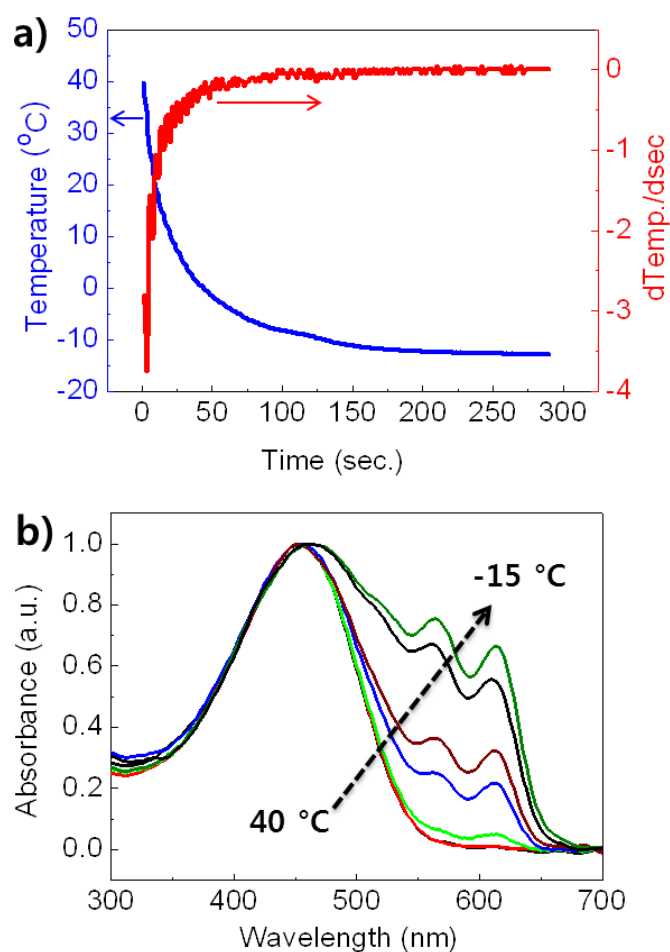

**Fig. S1** a) *In-situ* change of the P3HT solution (0.25 wt% in *m*-xylene) temperature in the cooling zone (-15 °C) and differentiation value of the temperature change over time. b) The *in-situ* UV-vis absorption spectra of the P3HT solution while decreasing the temperature from 40 °C to -15 °C.

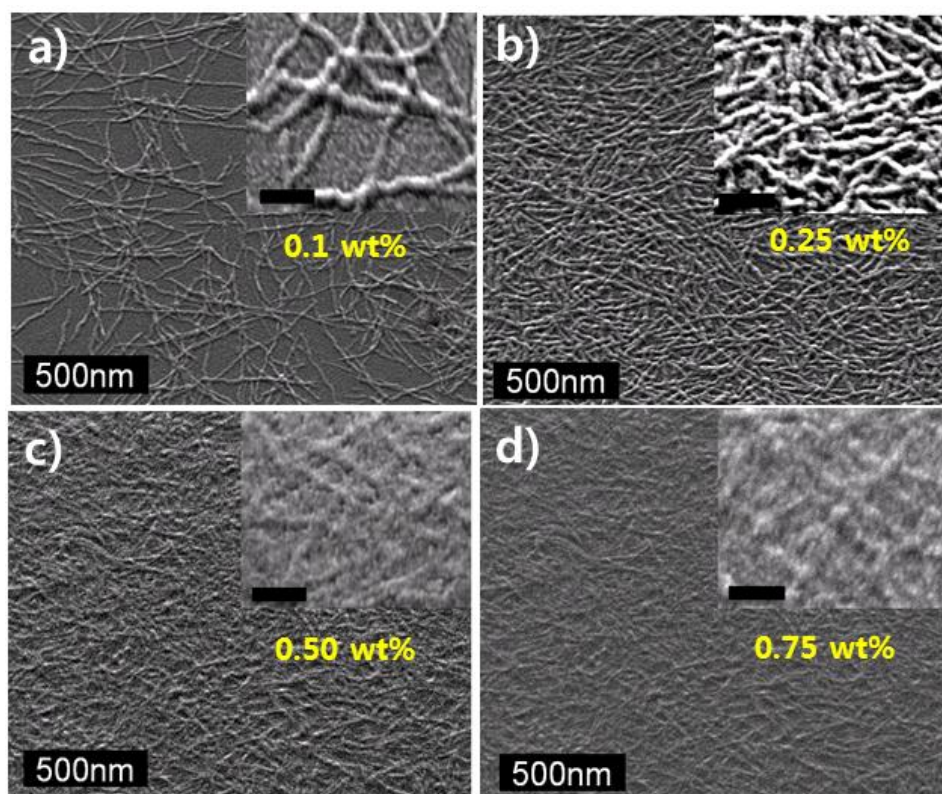

**Fig. S2** SEM images that represent the density of P3HT nanofabric film depending on the concentration of the P3HT solution a) 0.1 wt%, b) 0.25 wt%, c) 0.5wt% and 0.75 wt%.

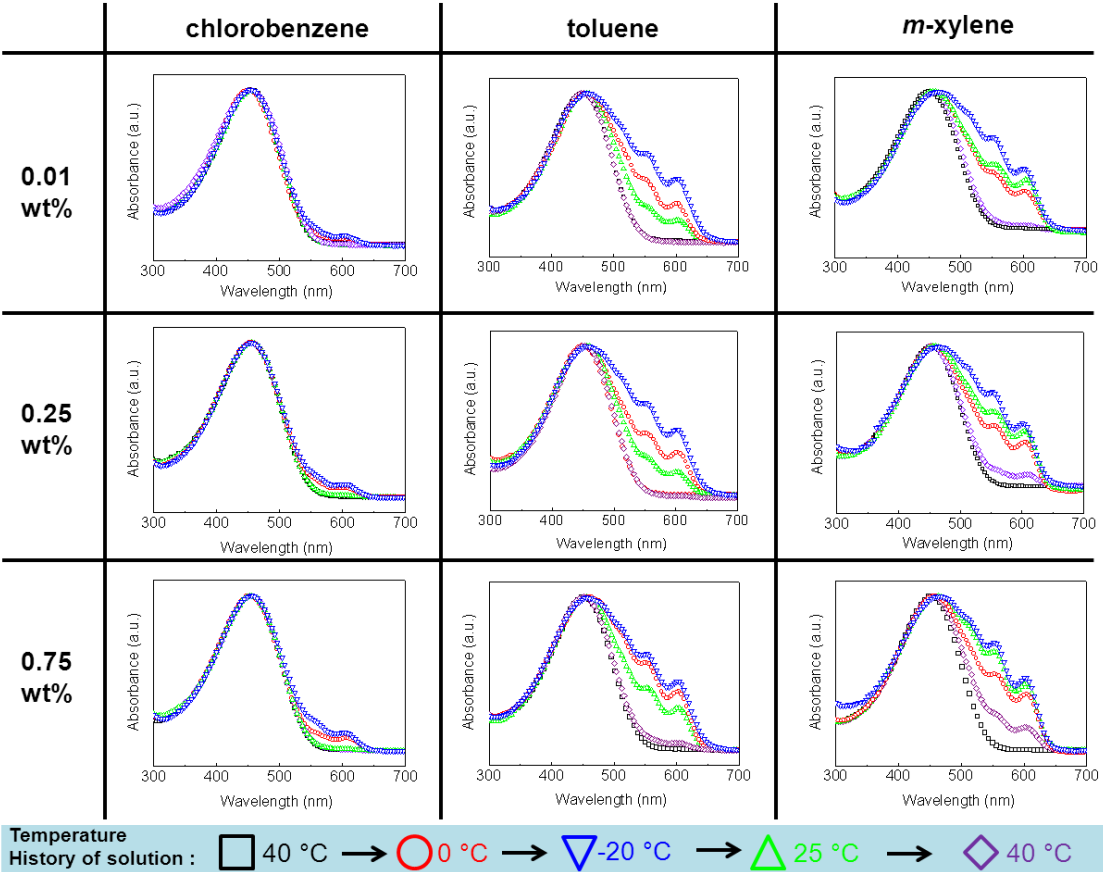

**Fig. S3** UV-vis absorbance spectra depending on temperature history of solutions as function of solvent property and concentration of solution.

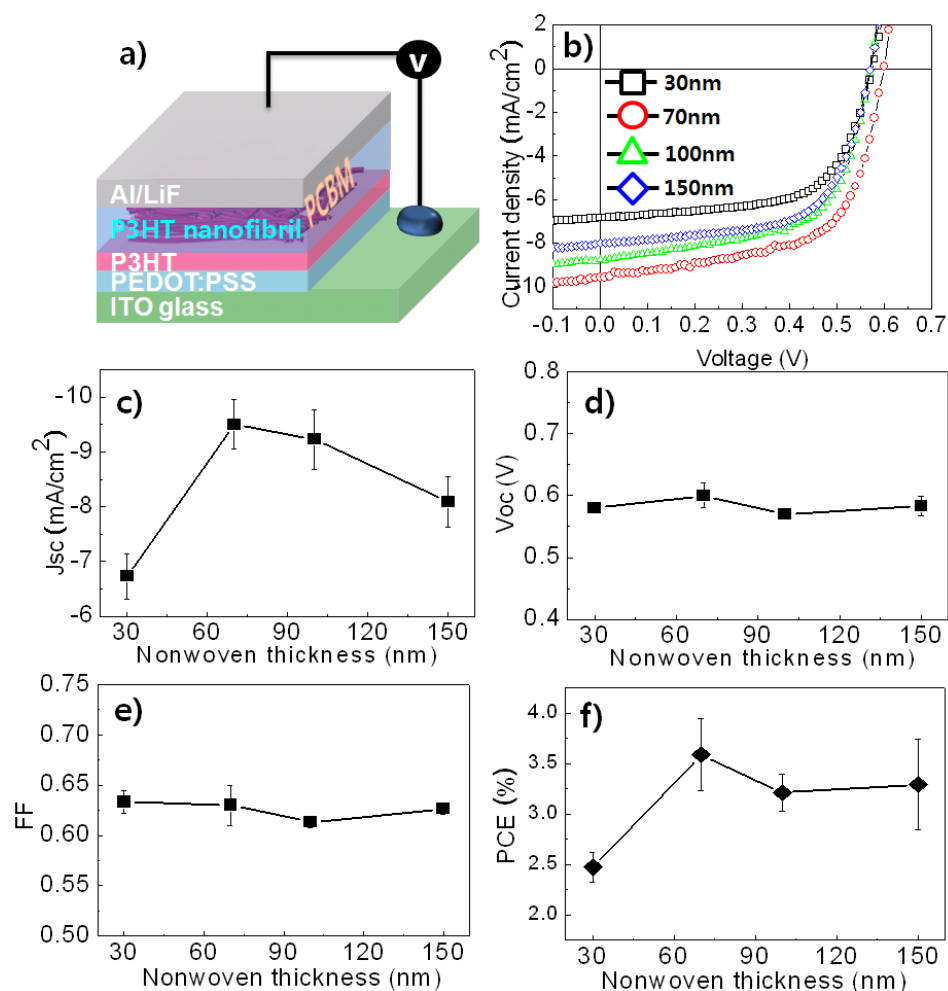

**Fig. S4** The dependence of the thickness of the non-woven structure on the device performance: a) Structure of the 3D non-woven nanofabric-based organic solar cell. b) Representative  $J-V$  curve depending on the thickness of nonwoven structure (the symbol values represents the P3HT thickness, thickness ratio of the P3HT and PCBM is 7:3). c) Influence of varying the thicknesses of the non-woven structure on c)  $J_{sc}$ , d)  $V_{oc}$ , e) FF and f) PCE values of the devices.

**Supporting information Video S1:** A video file related to the systematical spray deposition of the *in-situ* formed P3HT nanofibril via double-jacket cooling on the target substrate.
